# Supplementary material for: Mesenchymal Stem Cell Membrane-Coated TPCS2a-Loaded Nanoparticles for Breast Cancer Photodynamic Therapy
Source: MDPI journal article supplement (doi:10.3390/pharmaceutics15061654), 2023-06-04
Supplement: s1 [file s1]

## Supporting Information

# Mesenchymal Stem Cell Membrane-Coated TPCS<sub>2a</sub>-Loaded Nanoparticles for Breast Cancer Photodynamic Therapy

Greta Avancini <sup>1,†</sup>, Luca Menilli <sup>1,†</sup>, Adele Visentin <sup>2</sup>, Celeste Milani <sup>1</sup>, Francesca Mastrotto <sup>2,\*,‡</sup>  
and Francesca Moret <sup>1,\*‡</sup>

<sup>1</sup> Department of Biology, University of Padova, Via Ugo Bassi 58/B, 35131 Padova, Italy;  
greta.avancini@phd.unipd.it (G.A.); luca.menilli@unipd.it (L.M.);  
celeste.milani@phd.unipd.it (C.M.)

<sup>2</sup> Department of Pharmaceutical and Pharmacological Sciences, University of Padova,  
Via F. Marzolo 5, 35131 Padova, Italy; adelevisentin96@gmail.com

\* Correspondence: francesca.mastrotto@unipd.it (F.M.); francesca.moret@unipd.it (F.M.)

† These authors equally contributed to this paper.

‡ These authors equally contributed as senior and corresponding authors.

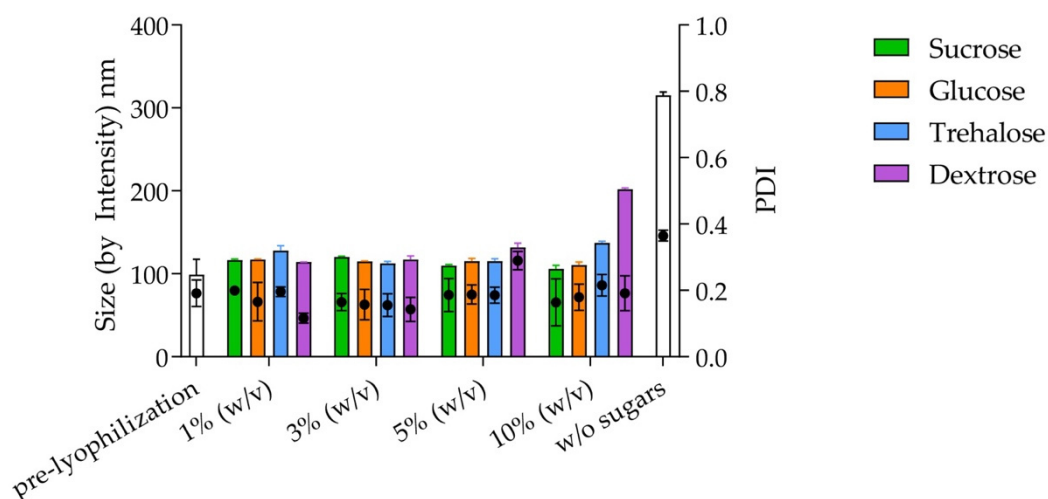

**Figure S1. Lyophilization studies.** Size (expressed by Intensity) and PDI of TPCS<sub>2a</sub>@NPs re-suspended in water after freeze-drying with different percentages (w/v) of sucrose, glucose, trehalose and dextrose as cryoprotectants measured by dynamic light scattering (DLS).

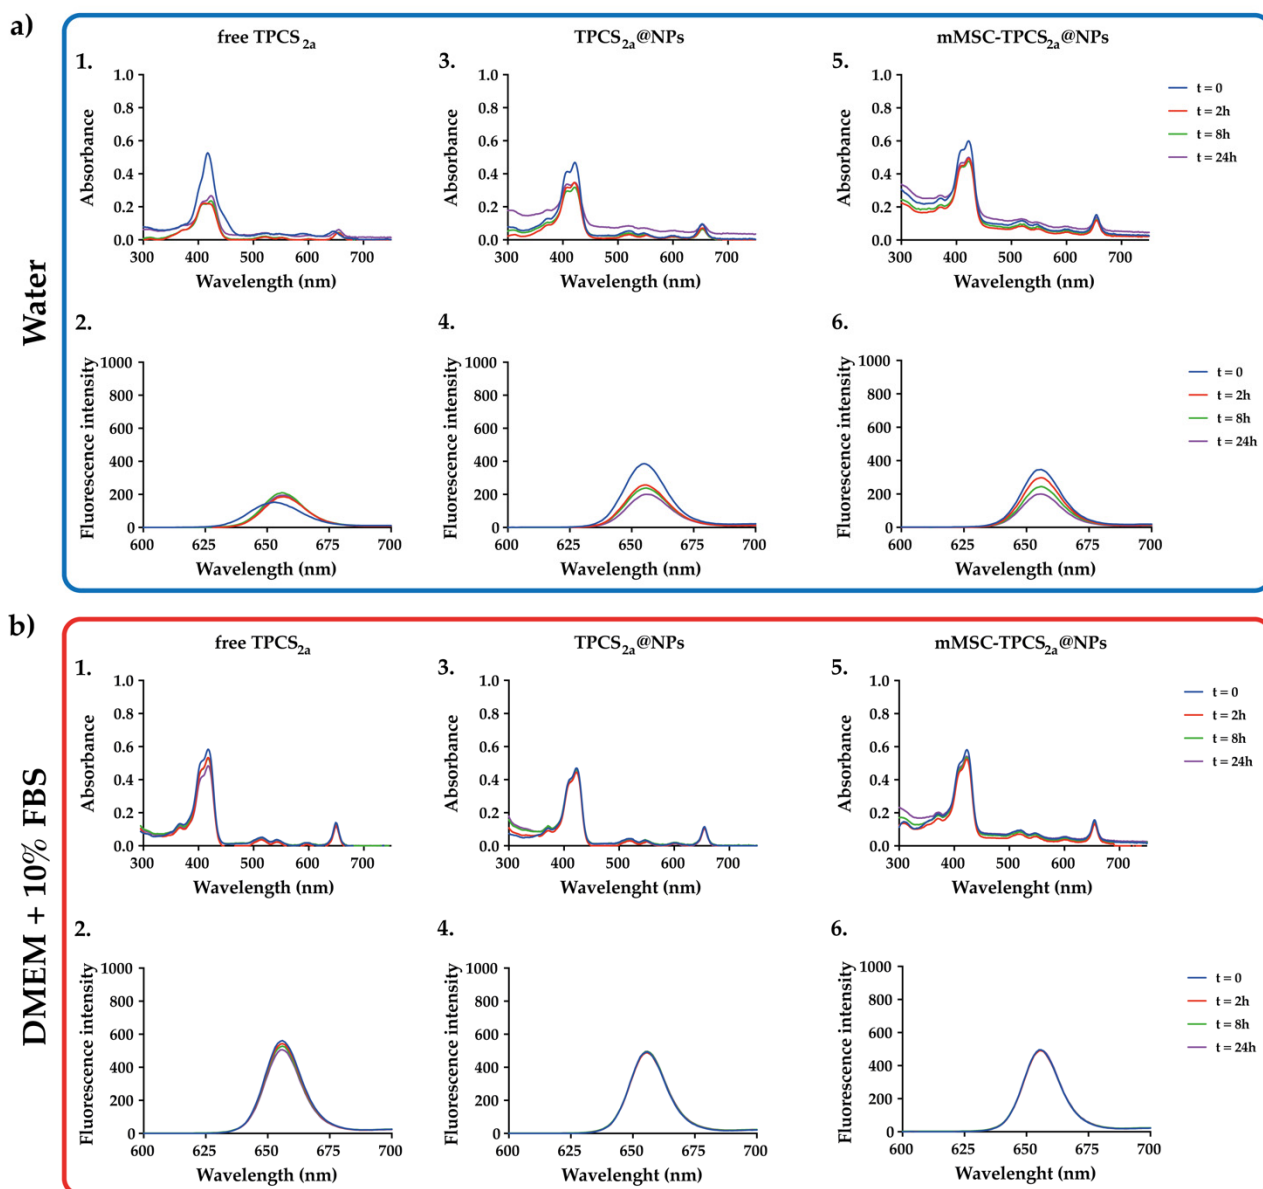

**Figure S2. Absorption and fluorescence spectra of TPCS<sub>2a</sub> formulations in different solvents.** Absorption and fluorescence spectra of TPCS<sub>2a</sub> in the free form (1,2), TPCS<sub>2a</sub>@NPs (3,4) and mMSC-TPCS<sub>2a</sub>@NPs (5,6) in H<sub>2</sub>O (a) and DMEM + 10 % of FBS (b). Spectra were acquired at time 0 (■) and after 2 (■), 8 (■) and 24 h (■) of incubation at 37 °C.

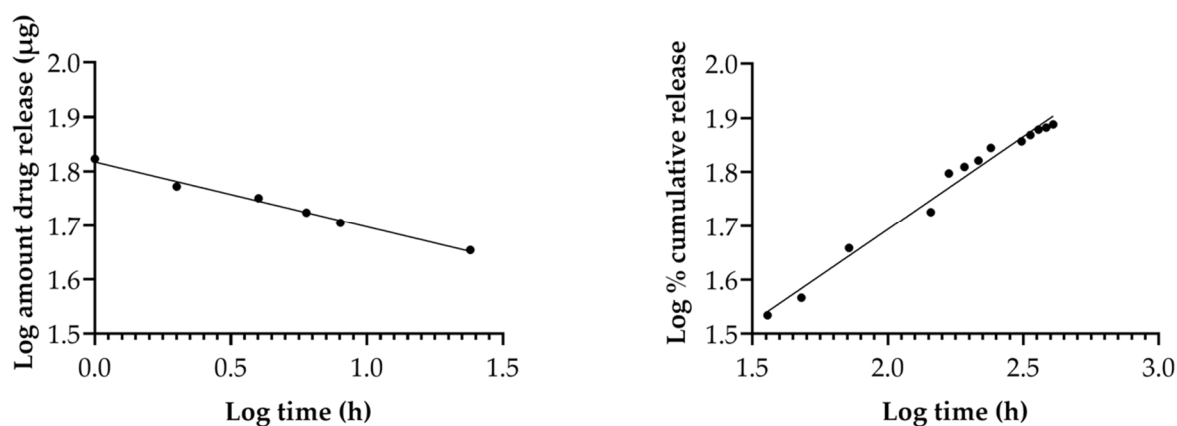

**Figure S3. Drug release kinetic plot from TPCS<sub>2a</sub>@NPs.** Weibull plot for the first 24 h is displayed on the left panel and Korsmeyer-Peppas plot for the following 16 days is displayed on the right panel.

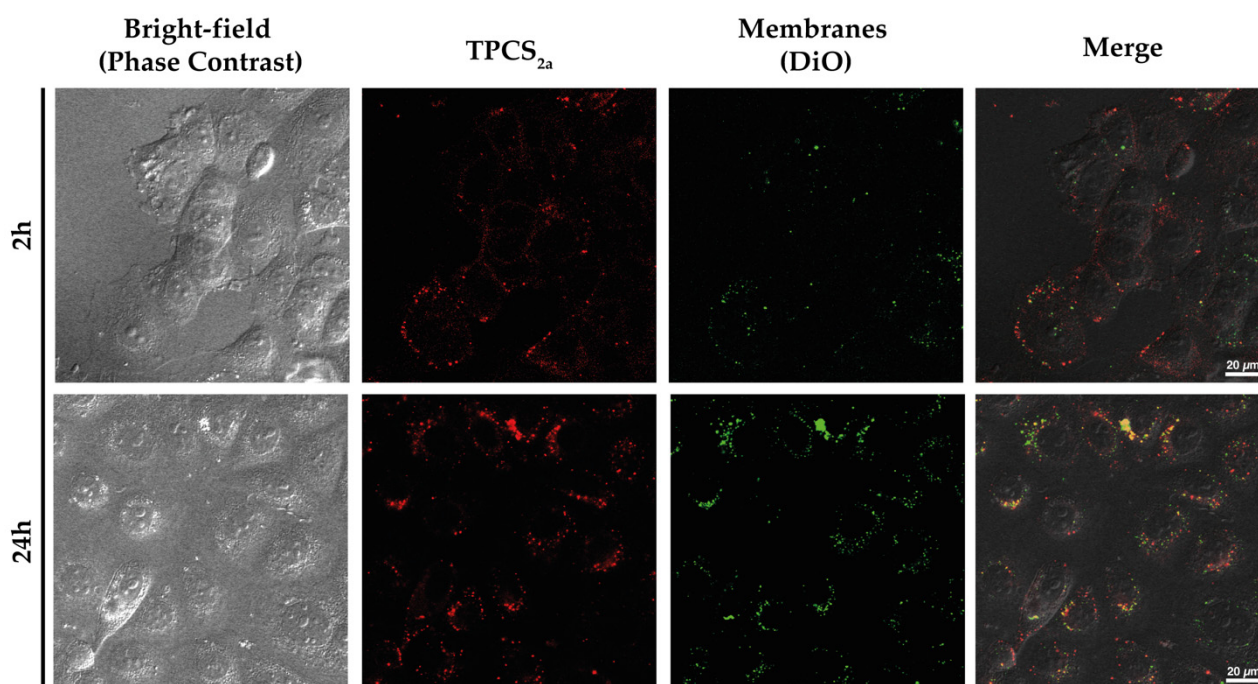

**Figure S4. Endocytosis of mMSC-TPCS<sub>2a</sub>@NPs.** Confocal microscopy images of MCF7 cells incubated for 2 or 24 h with 1 μM of TPCS<sub>2a</sub>@NPs or mMSC-TPCS<sub>2a</sub>@NPs showing co-localization of TPCS<sub>2a</sub> (red) and DiO-labeled MSC membranes (green) covering the NPs. Scale bars: 20 μm.
